# Supplementary material
Source: Frontiers journal article supplement (https://www.frontiersin.org/articles/346801)
Supplement: Table_2.PDF [file Table_2.PDF]

Supplementary Table 2. The average plant height during the development under different light conditions.

| Age of plants<br>(day) | Plant height (cm) |         |        |        |         |         |
|------------------------|-------------------|---------|--------|--------|---------|---------|
|                        | Fluorescent white | Pink    | Blue   | RedFR  | RedLL   | RedHL   |
| 54                     | 38.50a            | 36.16b  | 31.16c | 39.00a | 37.00ab | 36.44b  |
| 74                     | 47.77c            | 52.08b  | 45.84d | 54.76a | 53.60ab | 49.40c  |
| 94                     | 50.60cd           | 56.92b  | 48.20d | 61.88a | 56.24b  | 53.40bc |
| 114                    | 54.10cd           | 59.95b  | 52.04d | 66.22a | 59.60b  | 56.98bc |
| 124                    | 56.03cd           | 60.47b  | 53.46d | 66.22a | 60.94b  | 58.44bc |
| 134                    | 56.05cd           | 60.75bc | 53.72d | 65.96a | 61.44b  | 58.50c  |

Values are the mean of at least 25 measurements per light treatment. The different letters indicate statistically significant differences at  $P < 0.05$ , using Tukey's *post hoc* test.
